# Association Between Microalbuminuria and the Metabolic Syndrome: NHANES III

Latha Palaniappan, Mercedes Carnethon, and Stephen P. Fortmann

**Background:** We investigated whether microalbuminuria was associated with the metabolic syndrome by comparing the strength of the association between microalbuminuria and the syndrome as a whole and its individual components.

**Methods:** This investigation included 5659 women and men aged 20 to 80 years from the cross-sectional, nationally representative, Third National Health and Nutrition Examination Survey (NHANES III: 1988-1994). Metabolic syndrome was defined as any three of the following: increased waist circumference, increased triglycerides, decreased HDL cholesterol, increased blood pressure, or high fasting glucose. Microalbuminuria was defined as urinary albumin/creatinine ratio of 30 to 300 mg/g.

**Results:** Microalbuminuria was present in 7.8% of women and 5.0% of men. Log linear analysis revealed a significant association between the metabolic syndrome and microalbuminuria in both genders (women  $\chi^2 = 44.1$ ; men  $\chi^2 = 59.6$ ;  $P < .0001$  for both). Microalbuminuria

was more common in both women (odds ratio [OR] = 2.2; 95% confidence interval [CI] 1.44, 3.34) and men (OR = 4.1; 95% CI 2.45, 6.74) with metabolic syndrome compared to those without it; 34% of women and 42% of men with microalbuminuria also had metabolic syndrome. After adjusting for other components of the metabolic syndrome, hypertension demonstrated the strongest association with microalbuminuria in both women (OR = 3.34; 95% CI 2.45, 4.55) and men (OR = 2.51; 95% CI 1.63, 3.86).

**Conclusions:** Microalbuminuria and metabolic syndrome are associated in a large, nationally representative cohort, possibly due to early renal effects of hypertension, and it may be useful to consider microalbuminuria as a component of the metabolic syndrome. Am J Hypertens 2003;16:952-958 © 2003 American Journal of Hypertension, Ltd.

**Key Words:** Metabolic cardiovascular syndrome, albuminuria, hypertension, population.

The term metabolic syndrome refers to an apparent clustering of several findings in patients: abdominal obesity, insulin resistance (elevated fasting glucose), hypertension, and dyslipidemia (elevated triglyceride and decreased HDL cholesterol levels).<sup>1</sup> In 2001 the National Cholesterol Education Program (NCEP) Adult Treatment Panel III (ATP III) report provided the first definition of the syndrome in national guidelines.<sup>2</sup> According to this definition more than 20% of adults have metabolic syndrome.<sup>3</sup> In 1998, the World Health Organization (WHO) had also proposed a unifying definition for the metabolic syndrome, which included the same components as the new ATP III definition, with the addition of microalbuminuria.<sup>4</sup>

The inclusion of microalbuminuria as part of the metabolic syndrome has been controversial because of its weak association with insulin resistance in some studies,<sup>5</sup> but not others.<sup>6</sup> There is also considerable evidence that

microalbuminuria is a strong predictor of cardiovascular mortality.<sup>7,8</sup> It is well established that microalbuminuria is related to hypertension<sup>9</sup> and central adiposity,<sup>10</sup> both components of the metabolic syndrome. It is thought that microalbuminuria may be the renal expression of general vascular endothelial damage, specifically increased vascular permeability, and thus an early indicator of atherosclerosis.<sup>11</sup>

Previously, there has not been a standard definition of the metabolic syndrome to fully evaluate degree of association with microalbuminuria. Compared to previous definitions, the new ATP III guidelines define metabolic syndrome using lower fasting glucose, lower blood pressure (BP), and higher HDL criteria. It is important to assess whether microalbuminuria is associated with the metabolic syndrome when it is defined by these preclinical states. Previous observational studies evaluating the relationship between microalbuminuria and metabolic syn-

Received December 4, 2002. First decision January 31, 2003. Accepted May 20, 2003.

From the Stanford Center for Research in Disease Prevention, Stanford University School of Medicine, Stanford, California.

Dr. Carnethon is currently affiliated with the Department of Preventive Medicine, Feinberg School of Medicine, Northwestern University, Chicago, IL.

Address correspondence and reprint requests to Dr. Latha Palaniappan, 1000 Welch Rd, Palo Alto, CA 94305; e-mail: lathap@stanford.edu

drome have been limited in number of participants,<sup>12,13</sup> and done outside of US populations.<sup>12,13</sup> The current study assesses the relationship between the metabolic syndrome as defined by ATP III and microalbuminuria as defined by WHO in the large population-based Third National Health and Nutrition Examination Survey (NHANES III).

## Methods

The Third National Health and Nutrition Examination Survey, conducted between 1988 and 1994 by the National Center for Health Statistics, was designed to assess the health status of the US civilian noninstitutionalized population  $\geq 2$  months of age. A representative sample of the population was recruited using a multistage, stratified sampling design. Survey participants were non-Hispanic white, African American, and Mexican-American aged 2 months and older, with oversampling of participants who were young, elderly, African American or Mexican-American to allow for more precise calculation of prevalence estimates of health behaviors in these groups. Demographic characteristics were collected during a standardized interview. Age was defined at the time of the household interview. Self-reported race/ethnicity was categorized as non-Hispanic white, non-Hispanic black, or Mexican-American. Participants who did not identify with any of these categories were classified into an "other" race category.

The operation and procedures have been described.<sup>14</sup>

As detailed in the ATP III report<sup>2</sup>, the metabolic syndrome is defined as three or more of the following characteristics: 1) abdominal obesity: waist circumference  $>102$  cm in men and  $>88$  cm in women; 2) hypertriglyceridemia:  $\geq 150$  mg/dL (1.69 mmol/L); 3) low HDL cholesterol:  $<40$  mg/dL (1.04 mmol/L) in men and  $<50$  mg/dL (1.29 mmol/L) in women; 4) high BP: systolic BP  $\geq 130$  mm Hg and diastolic BP  $\geq 85$  mm Hg; and 5) high fasting glucose:  $\geq 110$  mg/dL ( $\geq 6.1$  mmol/L).

## Metabolic Syndrome Components

Participants underwent a detailed physical examination at a mobile examination center. Waist circumference was measured at the midpoint between the bottom of the rib cage and above the top of the iliac crest from participants at minimal respiration to the nearest 0.1 cm. The procedure for blood collection and processing has been described.<sup>14</sup> Serum samples were shipped to the Lipoprotein Analytical Laboratory at Johns Hopkins University, Baltimore, Maryland; serum triglycerides were measured enzymatically after hydrolyzation to glycerol (Hitachi 704 Analyzer; Hitachi, Tokyo, Japan) and total and HDL cholesterol were assessed using a Hitachi 737 Analyzer (Boehringer-Mannheim Diagnostics, Indianapolis, IN). Blood pressure was measured from seated participants three times during the household interview and three times at the mobile examination center; all available systolic and diastolic measurements were averaged. Participants who

used hypertension control medications or reported a previous physician diagnosis (two or more occasions) were defined as having high BP. Plasma glucose was measured using a modified hexokinase enzymatic method (Cobas Mira assay; Roche, Basel, Switzerland). The interassay coefficient of variation was  $<4\%$  during the 6 years of the survey. Participants who reported currently using antidiabetic medication (insulin or oral agents) were defined as having high fasting glucose.

## Microalbuminuria

During the examination, a random untimed urine sample was obtained from participants using clean-catch techniques. Urine samples were frozen and shipped to a central laboratory for analysis. Urinary albumin concentration was measured by solid-phase fluorescent immunoassay<sup>15</sup> on thawed samples. Measurements were not performed on specimens with visible hematuria or on those testing positive for hemoglobin using qualitative test strips (Multistix; Bay Corp, Elkhart, IN). Urinary creatinine concentration was measured by the modified kinetic method of Jaffe,<sup>16</sup> using a Beckman Synchron AS/ASTRA analyzer (Beckman Instruments, Inc., Brea, CA). Interassay coefficients of variation were  $<16\%$  and  $10\%$  for low (1.0 mg/L) and medium (7 mg/L) urinary albumin samples, respectively. Coefficients of variation for all levels of urinary creatinine were  $<8\%$ . Microalbuminuria is defined as a urinary albumin-to-creatinine ratio (ACR) of 30 to 300 mg/g. Details about the laboratory procedures of all these tests are published elsewhere.<sup>17</sup>

## Exclusions

Fasting blood specimens were obtained in 17,287 participants aged more than 20 years and less than 80 years. We excluded participants with missing values for glucose (2387), waist circumference (2458), HDL (2470), triglycerides (6248), systolic BP (249), diastolic BP (255), ethnicity (1508), and ACR (1744). We excluded participants who fasted for fewer than 8 hours (4022), those with serum creatinine  $>1.5$  mg/dL and ACR  $>300$  mg/g (298), and women who were pregnant (821). The sample for our analysis includes 5659 participants.

## Data Analysis

Primary analyses, using linear models, were carried out in SUDAAN (Research Triangle Institute, Cary, NC), to adjust for the complex sample design of NHANES III (sampling weights are incorporated to adjust for unequal probabilities of selection). Analyses were stratified by gender. Means (standard deviations) and proportions of baseline characteristics were compared by ethnicity group using *t*-tests and  $\chi^2$  tests, respectively. We did not find differences in the association between metabolic syndrome and microalbuminuria by ethnicity, and further analyses were pooled. Log-linear models were used to test whether microalbuminuria and metabolic syndrome were statisti-



**Table 2.** Distribution of the components of the metabolic syndrome

|                        | Women            |                  |        | Men               |                  |        |
|------------------------|------------------|------------------|--------|-------------------|------------------|--------|
|                        | Microalbuminuria | Normoalbuminuria | P      | Microalbuminuria* | Normoalbuminuria | P      |
| N                      | 247              | 2558             |        | 198               | 2656             |        |
| Large waist (%)        | 52.5             | 45.1             | .06    | 50.8              | 25.6             | .0015  |
| High triglycerides (%) | 30.7             | 21.4             | .02    | 50.0              | 30.0             | .0019  |
| Low HDL (%)            | 41.3             | 38.0             | .45    | 35.4              | 35.0             | .95    |
| High BP (%)            | 40.3             | 15.4             | <.0001 | 39.7              | 14.4             | <.0001 |
| High glucose (%)       | 21.6             | 8.2              | .0002  | 32.2              | 11.3             | .0005  |
| Metabolic syndrome (%) | 33.9             | 18.6             | <.0001 | 41.5              | 15.9             | .0005  |

\* Microalbuminuria defined as urinary albumin to creatinine ratio (ACR) of 30 to 300 mg/g. Normoalbuminuria defined as ACR <30 mg/g.

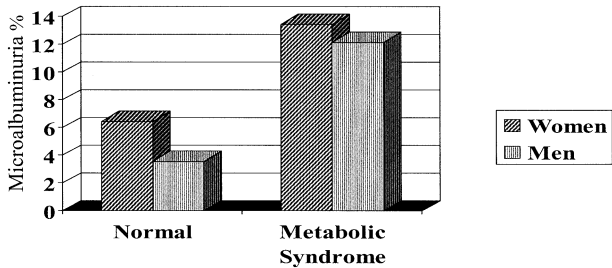

**FIG. 1.** Prevalence of microalbuminuria by metabolic syndrome.

Estimates for metabolic syndrome and microalbuminuria based on US Census 2000 data are shown in Table 4. Including microalbuminuria as one of the components of metabolic syndrome increases the number of identified cases of metabolic syndrome by 7.5% in women and 5.6% in men. An additional 3.4 million women and 3.6 million men would be identified for treatment of the metabolic syndrome in the US.

**Discussion**

In this population-based analysis we found strong positive associations between microalbuminuria and the metabolic syndrome in both women and men. Within the population, high glucose and high BP were the components most

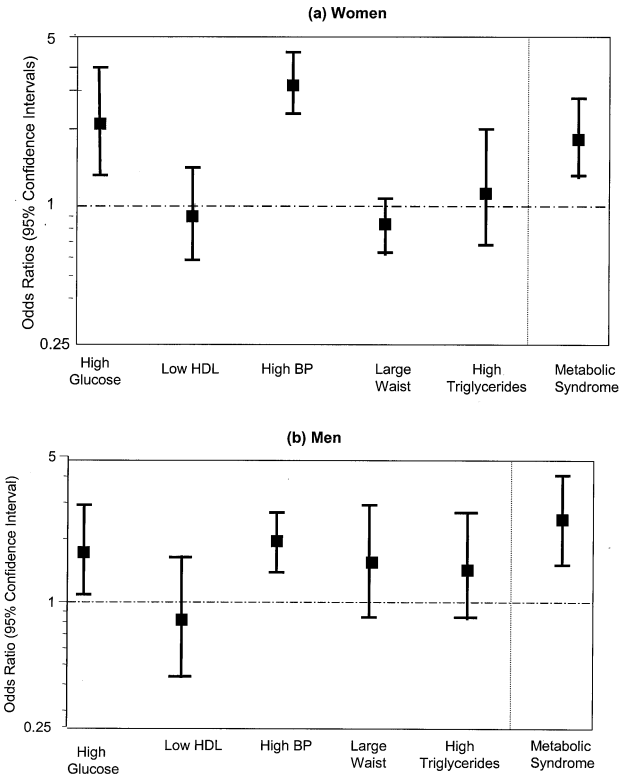

**FIG. 2.** Age-adjusted odds ratio and 95% confidence intervals of microalbuminuria by the components of the metabolic syndrome. All variables simultaneously in one model, except metabolic syndrome, which is only age adjusted. BP = blood pressure.

**Table 3.** Odds of microalbuminuria by components of the metabolic syndrome

|              | Women |             |        | Men  |             |        |
|--------------|-------|-------------|--------|------|-------------|--------|
|              | OR    | (95% CI)    | P      | OR*  | (95% CI)    | P      |
| High glucose | 2.24  | (1.25–4.00) | .0047  | 2.51 | (1.54–4.10) | .0001  |
| Low HDL      | 0.89  | (0.58–1.37) | .5868  | 0.76 | (0.37–1.55) | .4338  |
| High BP      | 3.34  | (2.45–4.55) | <.0001 | 2.51 | (1.63–3.86) | <.0001 |
| High TG      | 1.17  | (0.65–2.10) | .5789  | 1.61 | (0.89–2.91) | .0995  |
| Large waist  | 0.8   | (0.59–1.08) | .1342  | 2.05 | (1.12–3.75) | .0159  |

\* OR = Odds ratios, adjusted for all other components in table.

strongly associated with microalbuminuria. The magnitude of this association persisted even after controlling for age and other components of the metabolic syndrome. These results indicate that microalbuminuria may be a component of the metabolic syndrome, supporting results from other epidemiologic studies.<sup>6,13,19,20</sup>

Hypertension has long been associated with microalbuminuria.<sup>6,13,21,22</sup> Increases in intraglomerular capillary pressure are thought to cause leakage of albumin.<sup>23</sup> Clinically, microalbuminuria may be an indicator of early vascular complications of hypertension. Yudkin<sup>24</sup> proposed in 1996 that the clustering of risk factors attributed to insulin resistance and microalbuminuria may all be features of damage to different aspects of endothelial function. Signs of early endothelial dysfunction as manifested by microalbuminuria may herald impending renal impairment, and may offer another focus for treatment of the metabolic syndrome.

The association between high glucose as defined by ATP III guidelines and microalbuminuria has not been previously examined. Prior studies have examined various surrogates for insulin resistance, including the homeostasis model index, fasting insulin levels, and more direct measures of insulin sensitivity such as frequently sampled intravenous glucose tolerance tests. The Hoorn study,<sup>25</sup> which used fasting hyperinsulinemia, insulin resistance (calculated from the formula of the homeostasis model assessment), and glucose intolerance showed no associa-

tions with microalbuminuria. The Insulin Resistance in Atherosclerosis Study<sup>6</sup> showed an increasing degree of insulin sensitivity was related to a decreasing prevalence of microalbuminuria using the minimal model and fasting plasma insulin concentration. A recent study of the Korean general population<sup>26</sup> also showed that subjects with microalbuminuria had a higher fasting plasma glucose than subjects without microalbuminuria. Our results indicate that a fasting plasma glucose level of >110 mg/dL is strongly associated with the presence of microalbuminuria.

Studies suggest that prevalence of microalbuminuria is greatest in populations with both hypertension and diabetes.<sup>27–29</sup> Our study extends these findings to even lower levels of BP and glucose. Microalbuminuria may reflect the chronicity of even mild BP and glucose elevations. These findings reinforce the concept that there is a vascular constellation of symptoms associated with these metabolic abnormalities.

Prior studies examining the relationships of metabolic syndrome factors have used different levels to designate abnormal values. This makes it difficult to compare the strength of association across studies. Researchers have divided studied populations into quartiles comparing the lowest to the highest, or have defined the 90th percentile as the cutpoint for “abnormal” factors. Differing measures for insulin resistance (as described here) and obesity (body mass index, waist to hip ratio, waist circumference) have

**Table 4.** Percentage of NHANES participants and US population-based estimates

|                                                                               | Percentage | US Population in Millions* |
|-------------------------------------------------------------------------------|------------|----------------------------|
| Women with metabolic syndrome                                                 | 20%        | 41.8                       |
| Men with metabolic syndrome                                                   | 17%        | 36.3                       |
| Women with microalbuminuria                                                   | 8%         | 16.5                       |
| Men with microalbuminuria                                                     | 5%         | 10.5                       |
| Women with metabolic syndrome that have microalbuminuria                      | 13%        | 5.6                        |
| Men with metabolic syndrome that have microalbuminuria                        | 12%        | 4.4                        |
| Women with metabolic syndrome, if microalbuminuria is included as a component | 21%        | 45.2                       |
| Men with metabolic syndrome, if microalbuminuria is included as a component   | 19%        | 39.9                       |

\* Based on 2000 census data, which reported 211,066,430 people in the US over the age of 18 years.

been used. Statistical methodology has also differed—comparisons of prevalences, odds ratios, and correlations have been variously used. This has led to inconsistent reporting of hypertension,<sup>12</sup> obesity,<sup>13</sup> dyslipidemia,<sup>30</sup> and insulin resistance,<sup>31</sup> as the strongest associated risk factor to microalbuminuria. The ATP III definition will allow researchers to uniformly compare the strength of association and prediction of various metabolic syndrome components across populations.

Microalbuminuria is a well-known cardiovascular disease marker,<sup>32</sup> and has been a strong predictor of cardiovascular morbidity and mortality in several studies.<sup>8,33</sup> A recent European longitudinal study<sup>20</sup> of the individual components of the metabolic syndrome (WHO definition) and subsequent risk of cardiovascular disease death found that microalbuminuria conferred the strongest risk of cardiovascular disease death when compared to obesity, hypertension, and dyslipidemia. The finding of microalbuminuria along with other components of the metabolic syndrome may increase the specificity of this risk prediction tool, and may explain the increased cardiovascular disease risk seen with this syndrome.

In this epidemiologic survey, a spot urine ACR was used as an acceptable substitute for a timed urine albumin measurement. Studies comparing spot urine ACR to 24-h urine collections in diabetics have found kappas ranging from 0.49 to 0.57, indicating good agreement.<sup>34</sup> In addition, sensitivities range from 71% to 75%, and specificities are 96% to 98%.<sup>34–36</sup> Although use of urinary albumin excretion is the gold standard, spot urine ACR offers a good estimation in epidemiologic surveys and has been used in many other studies<sup>13,19,32</sup> evaluating microalbuminuria in populations. Use of spot urine ACR to estimate microalbuminuria would result in nondifferential misclassification bias, and this leads to bias toward the null. Thus, in our analysis, the actual strength of the association would be higher than we have estimated.

The prevalence of microalbuminuria as defined by ACR was higher in women than in men in our analyses. Previous studies estimating prevalence of microalbuminuria in NHANES III<sup>37</sup> and other populations<sup>13</sup> have used ACR of 30 to 300 mg/g as the definition of microalbuminuria in both sexes. Studies suggest that sex-specific cutoffs for ACR are necessary to adjust for higher urine creatinine excretion found in men<sup>38,39</sup> due to increased muscle mass. Various sex-specific cutoffs have been proposed,<sup>38,39</sup> but none have been universally adopted. We chose to define microalbuminuria as an ACR of 30 to 300 mg/g in our analyses to reflect the WHO definition for microalbuminuria,<sup>4</sup> which is gender insensitive. Using sex-specific cutoffs of 17 mg/g in men and 25 mg/g in women,<sup>38</sup> we find that the prevalence of microalbuminuria is similar in both sexes. Lower cutpoints for ACR increases the prevalence of microalbuminuria in men, and further strengthens the association of metabolic syndrome and its high BP and high blood glucose components with microalbuminuria in men. There were no differences iden-

tified in the association of microalbuminuria and the metabolic syndrome or its components between men and women.

The NHANES III study is one of the most comprehensive national surveys to date. Extensive data are available from both the home survey and medical examination, and response rates were high. Unlike many surveys, NHANES III is a representative sample of the US population and therefore the results are generalizable and can be extrapolated to estimate the prevalence in the population using US census data. The principal limitation relevant to the interpretation of these results is the use of cross-sectional data, which limits inferences about causal pathways. There was also a large number of missing values, which greatly limited sample size available for analysis. Previous analyses to approximate the US population prevalence of metabolic syndrome,<sup>3</sup> based estimates on an NHANES III population of 8814 adults. This significant reduction in sample size reflects a large number of missing values for triglyceride level, which requires a fasting blood draw. Our analyses required even further exclusions due to missing values for urinary microalbumin. These exclusions are necessary to create accurate prevalence estimates, and are in accord with prior metabolic syndrome analyses in this dataset.

In summary, we found that microalbuminuria was highly associated with the metabolic syndrome, specifically the high fasting glucose and high BP components. These results suggest that there may be clinically important renal dysfunction associated with the metabolic syndrome in many patients and physicians would be wise to measure urinary albumin in this setting. Further research in this area could investigate the longitudinal relationship and explore pathways between metabolic syndrome and microalbuminuria.

## References

1. Reaven GM: Role of insulin resistance in human disease (syndrome X): an expanded definition. *Annu Rev Med* 1993;44:121–131.
2. Executive Summary: The Third Report of The National Cholesterol Education Program (NCEP) Expert Panel on Detection, Evaluation, And Treatment of High Blood Cholesterol In Adults (Adult Treatment Panel III). *JAMA* 2001;285:2486–2497.
3. Ford ES, Giles WH, Dietz WH: Prevalence of the metabolic syndrome among US adults: findings from the third National Health and Nutrition Examination Survey. *JAMA* 2002;287:356–359.
4. Alberti KG, Zimmet PZ: Definition, diagnosis and classification of diabetes mellitus and its complications. Part 1: diagnosis and classification of diabetes mellitus provisional report of a WHO consultation. *Diabet Med* 1998;15:539–553.
5. Zavaroni I, Bonini L, Gasparini P, Zuccarelli A, Dall'Aglio E, Barilli L, Cioni F, Strata A, Reaven GM. Dissociation between urinary albumin excretion and variables associated with insulin resistance in a healthy population. *J Intern Med* 1996;240:151–156.
6. Mykkanen L, Zaccaro DJ, Wagenknecht LE, Robbins DC, Gabriel M, Haffner SM: Microalbuminuria is associated with insulin resistance in nondiabetic subjects: the insulin resistance atherosclerosis study. *Diabetes* 1998;47:793–800.

7. Dinneen SF, Gerstein HC: The association of microalbuminuria and mortality in non-insulin-dependent diabetes mellitus. A systematic overview of the literature. *Arch Intern Med* 1997;157:1413–1418.
8. Borch-Johnsen K, Feldt-Rasmussen B, Strandgaard S, Schroll M, Jensen JS: Urinary albumin excretion. An independent predictor of ischemic heart disease. *Arterioscler Thromb Vasc Biol* 1999;19:1992–1997.
9. Bianchi S, Bigazzi R, Campese VM: Microalbuminuria in essential hypertension. *J Nephrol* 1997;10:216–219.
10. Scaglione R, Ganguzza A, Corrao S, Parrinello G, Merlino G, Dichiaro MA, Arnese S, D'Aubert MD, Licata G. Central obesity and hypertension: pathophysiologic role of renal haemodynamics and function. *Int J Obes Relat Metab Disord* 1995;19:403–409.
11. Deckert T, Feldt-Rasmussen B, Borch-Johnsen K, Jensen T, Kofoed-Enevoldsen A: Albuminuria reflects widespread vascular damage. The Steno hypothesis. *Diabetologia* 1989;32:219–226.
12. Rowley KG, Iser DM, Best JD, O'Dea K, Leonard D, McDermott R: Albuminuria in Australian Aboriginal people: prevalence and associations with components of the metabolic syndrome. *Diabetologia* 2000;43:1397–1403.
13. Liese AD, Hense HW, Doring A, Stieber J, Keil U: Microalbuminuria, central adiposity and hypertension in the non-diabetic urban population of the MONICA Augsburg survey 1994/95. *J Hum Hypertens* 2001;15:799–804.
14. Gunter EW, Lewis BG, Koncikowski SM: Laboratory Procedures Used for the Third National Health and Nutrition Examination Survey (NHANES) 1988–1994. Atlanta, GA, Centers for Disease Control and Prevention, 1996.
15. Chavers BM, Simonson J, Michael AF: A solid phase fluorescent immunoassay for the measurement of human urinary albumin. *Kidney Intern* 1984;25:576–578.
16. Fabiny DL, Ertingshausen G: Automated reaction-rate method for determination of serum creatinine with the CentrifChem. *Clin Chem* 1971;17:696–700.
17. National Center for Health Statistics: NHANES III reference manuals and reports (CD-ROM). Hyattsville, MD, Centers for Disease Control and Prevention, 1996.
18. State and County QuickFacts: Data derived from Population Estimates, 2000 Census of Population and Housing. U.S. Census Bureau, Friday, 06-Sep-2002 12:40:18 EDT. Available at: <http://quickfacts.census.gov/qfd/states/00000.html>. Accessed Sept 20, 2002.
19. Hoehner CM, Greenlund KJ, Rith-Najarian S, Casper ML, McClellan WM: Association of the insulin resistance syndrome and microalbuminuria among nondiabetic Native Americans. The Inter-Tribal Heart Project. *J Am Soc Nephrol* 2002;13:1626–1634.
20. Isomaa B, Almgren P, Tuomi T, Forsen B, Lahti K, Nissen M, Taskinen MR, Groop L: Cardiovascular morbidity and mortality associated with the metabolic syndrome. *Diabetes Care* 2001;24:683–689.
21. Srinivasan SR, Myers L, Berenson GS: Risk variables of insulin resistance syndrome in African-American and Caucasian young adults with microalbuminuria: the Bogalusa Heart Study. *Am J Hypertens* 2000;13:1274–1279.
22. Jiang X, Srinivasan SR, Radhakrishnamurthy B, Dalferes ER Jr, Bao W, Berenson GS: Microalbuminuria in young adults related to blood pressure in a biracial (black-white) population. The Bogalusa Heart Study. *Am J Hypertens* 1994;7:794–800.
23. Brenner BM: Hemodynamically mediated glomerular injury and the progressive nature of kidney disease. *Kidney Int* 1983;23:647–655.
24. Yudkin JS: Hyperinsulinaemia, insulin resistance, microalbuminuria and the risk of coronary heart disease. *Ann Med* 1996;28:433–438.
25. Jager A, Kostense PJ, Nijpels G, Heine RJ, Bouter LM, Stehouwer CD: Microalbuminuria is strongly associated with NIDDM and hypertension, but not with the insulin resistance syndrome: the Hoorn Study. *Diabetologia* 1998;41:694–700.
26. Kim YI, Kim CH, Choi CS, Chung YE, Lee MS, Lee SI, Park JY, Hong SK, Lee KU: Microalbuminuria is associated with the insulin resistance syndrome independent of hypertension and type 2 diabetes in the Korean population. *Diabetes Res Clin Pract* 2001;52:145–152.
27. Gerstein HC, Mann JF, Pogue J, Dinneen SF, Halle JP, Hoogwerf B, Joyce C, Rashkow A, Young J, Zinman B, Yusuf S. Prevalence and determinants of microalbuminuria in high-risk diabetic and nondiabetic patients in the Heart Outcomes Prevention Evaluation Study. The HOPE Study Investigators. *Diabetes Care* 2000;23(Suppl 2):B35–B39.
28. Lindeman RD, Romero L, Liang HC, Hundley R, Baumgartner R, Koehler K, Garry P. Prevalence of proteinuria/microalbuminuria in an elderly urban, biethnic community. *Geriatr Nephrol Urol* 1998;8:123–130.
29. Wronce E, Carnethon M, Palaniappan L, Fortmann S: Association of dietary protein intake and microalbuminuria in healthy adults: Third National Health and Nutrition Examination. *Am J Kidney Dis* 2003;41:580–587.
30. Spangler JG, Koenen JC: Hypertension, hyperlipidemia, and abdominal obesity and the development of microalbuminuria in patients with non-insulin-dependent diabetes mellitus. *J Am Board Fam Pract* 1996;9:1–6.
31. Meigs JB, Jacques PF, Selhub J, Singer DE, Nathan DM, Rifai N, D'Agostino RB, Sr., Wilson PW. Fasting plasma homocysteine levels in the insulin resistance syndrome: the Framingham offspring study. *Diabetes Care* 2001;24:1403–1410.
32. Jager A, Kostense PJ, Ruhe HG, Heine RJ, Nijpels G, Dekker JM, Bouter LM, Stehouwer CD. Microalbuminuria and peripheral arterial disease are independent predictors of cardiovascular and all-cause mortality, especially among hypertensive subjects: five-year follow-up of the Hoorn Study. *Arterioscler Thromb Vasc Biol* 1999;19:617–624.
33. Jensen JS, Borch-Johnsen K, Feldt-Rasmussen B, Appleyard M, Jensen G: Urinary albumin excretion and history of acute myocardial infarction in a cross-sectional population study of 2,613 individuals. *J Cardiovasc Risk* 1997;4:121–125.
34. Jermendy G, Farkas K, Nadas J, Daroczy A, Peterfai E: Practical aspects of measuring microalbuminuria in diabetic patients. *Diabetes Nutr Metab* 2001;14:195–200.
35. Ng WY, Lui KF, Thai AC: Evaluation of a rapid screening test for microalbuminuria with a spot measurement of urine albumin-creatinine ratio. *Ann Acad Med Singapore* 2000;29:62–65.
36. Derhaschnig U, Kittler H, Woisetschlager C, Bur A, Herkner H, Hirschl MM: Microalbumin measurement alone or calculation of the albumin/creatinine ratio for the screening of hypertension patients? *Nephrol Dial Transplant* 2002;17:81–85.
37. Jones CA, Francis ME, Eberhardt MS, Chavers B, Coresh J, Engelgau M, Kusek JW, Byrd-Holt D, Narayan KM, Herman WH, Jones CP, Salive M, Agodoa LY. Microalbuminuria in the US population: Third National Health and Nutrition Examination Survey. *Am J Kidney Dis* 2002;39:445–459.
38. Mattix HJ, Hsu CY, Shaykevich S, Curhan G: Use of the albumin/creatinine ratio to detect microalbuminuria: implications of sex and race. *J Am Soc Nephrol* 2002;13:1034–1039.
39. Houlihan CA, Tsalamandris C, Akdeniz A, Jerums G: Albumin to creatinine ratio: a screening test with limitations. *Am J Kidney Dis* 2002;39:1183–1189.
